# Supplementary material
Source: PubMed Central journal article supplement (PMC6386710)
Supplement: pnas.1818507116.sapp.pdf [file pnas.1818507116.sapp.pdf]

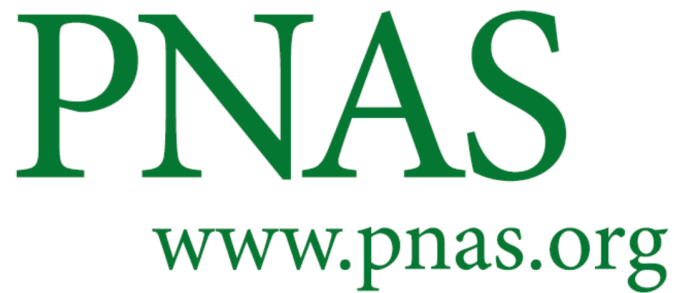

## Supplementary Information for

### **Regulatory Cascade Involving Transcriptional and N-end Rule Pathways in Rice under Submergence**

Chih-Cheng Lin, Ya-Ting Chao, Wan-Chieh Chen, Hsiu-Yin Ho, Mei-Yi Chou, Ya-Ru Li, Yu-Lin Wu, Hung-An Yang, Hsiang Hsieh, Choun-Sea Lin, Fu-Hui Wu, Shu-Jen Chou, Hao-Chung Jen, Yung-Hsiang Huang, Deli Irene, Wen-Jin Wu, Jian-Li Wu, Daniel J. Gibbs, Meng-Chiao Ho, Ming-Che Shih

**Corresponding author:** Ming-Che Shih, Meng-Chiao Ho

**Email:** mcshih@gate.sinica.edu.tw, joeho@gate.sinica.edu.tw

#### **This PDF file includes:**

Supplementary text  
Figs. S1 to S10  
Tables S1 to S3  
References for SI reference citations

#### **Other supplementary materials for this manuscript include the following:**

Dataset S1

## **Supplementary Text**

### **SI Materials and Methods**

#### **Growth Conditions and Submergence Treatment for Arabidopsis**

Arabidopsis seeds were sterilized with 0.5% (v/v) sodium hypochlorite for 15 min and washed with sterilized water. Seeds were sown on plates with 0.57% Phytigel (Sigma-Aldrich) in half-strength Murashige and Skoog (MS) medium (Duchefa Biochemie) containing 0.5% sucrose at pH 5.7 and kept at 4°C in the dark for three days to achieve uniform germination, then the plates were transferred to a growth chamber and grown at 22°C with a 16-h-light (81  $\mu\text{mol}\cdot\text{m}^{-2}\cdot\text{s}^{-1}$ )/8-h-dark cycle for four days. To reach 14-d-old for submergence treatment, 7-d-old seedlings were transplanted onto fresh plates, and the plates were placed vertically to prevent roots from growing into medium. The transplanted seedlings were grown in the growth chamber until they were 14-d-old. For submergence treatment of 14-d-old Arabidopsis seedlings, plates with plants on the surface of the medium were placed into half-strength MS liquid medium that was bubbled with 3% oxygen balanced with nitrogen for the indicated times. The liquid MS medium was pretreated with 3% oxygen for 1 h before use.

#### **RNA extraction and qRT-PCR**

Total RNA from treated samples were isolated by using TRIzol (Invitrogen) following the manufacturer's instructions. DNase treatment, Reverse Transcription and qRT-PCR were conducted as previously described (61). Briefly, first-strand cDNAs were synthesized from 2  $\mu\text{g}$  of extracted total RNA using M-MLV reverse transcriptase (Invitrogen). The synthesized cDNAs were further made a five-fold dilution. qRT-PCR was performed using 1  $\mu\text{L}$  diluted cDNAs, 0.2  $\mu\text{M}$  each primer, and SYBR Green PCR Master Mix (Applied Biosystems) on an ABI 7500 real time PCR machine (Applied Biosystems) using the default settings. Primer sequences can be found in Table S1. Tubulin (LOC\_Os07g38730) was used as an internal control for normalization. Relative expression level is determined by  $\Delta\text{C}_T$  of target gene normalized to the internal control.

#### **RNA-seq and data analysis**

Fourteen days old SUB1A-1 OE/ERF66 OE/ERF67 OE transgenic plants and non-transformed TNG67 (as a control) were submerged for 24 h, and the whole-shoot tissue was harvested before (T0) and after (T24) treatment to perform RNA extraction and RNA-seq. Total RNA from three independent biological samples were isolated by using TRIzol (Invitrogen) following the manufacturer's instructions. DNase treatment was conducted as previously described (61). RNA libraries were constructed by using Truseq Stranded mRNA library preparation kit (Illumina). All procedures followed the protocol provided by the manufacturer. The steps of library constructions included mRNA isolation, RNA fragmentation, cDNA synthesis, adaptor ligation and DNA enrichment, starting with 4 µg of total RNA. All sequencing data were generated using Illumina sequencing, following standard protocols, with the HiSeq2500 platform. Paired-end sequencing reads were trimmed and filtered using Trimmomatic (version 0.32) (62). The clean reads were mapped to the Os-Nipponbare-Reference-IRGSP-1.0 (IRGSP-1.0) annotated reference transcriptome from the Rice Annotation Project Database (RAP-DB, <https://rapdb.dna.affrc.go.jp/>) by Bowtie2 (63). Read counts were then analyzed for differentially expressed genes using DESeq2 (version 3.7) (64). Genes with a log<sub>2</sub> fold-change above 1 (or below -1) and an adjusted P-value below 0.05 were defined as differentially expressed. Gene Ontology (GO) analyses of RNA-seq data were conducted using agriGO (<http://bioinfo.cau.edu.cn/agriGO/index.php>) (65) and choose  $P < 0.05$  as the cut-off for significant GO terms. Raw RNAseq data have been deposited in the National Center for Biotechnology Information (NCBI) BioProject database (Accession number: PRJNA512592; <https://www.ncbi.nlm.nih.gov/sra/PRJNA512592>).

### **Plasmid Construction**

For *trans*-activation assays, effector and reporter vectors were generated following the procedures outlined in (66). We further incorporated the Gateway gene cloning system (Invitrogen) to generate the effector gateway vector, pUbiP-GW, and the reporter gateway vector, pGW-Luc. The pUbiP-GW contained *Ubiquitin* promoter, *ccdB* fragment and *Nos* terminator and pGW-Luc contained *CaMV35S* minimal promoter, *Adh1* intron, *ccdB* fragment and *luciferase* coding sequence, sequentially. The CDS of *SUB1A-1* was amplified by PCR using submerged FR13A cDNA as the template, and ligated into the pCR8/GW/TOPO (Invitrogen). By Gateway system (Invitrogen), the

SUB1A-1 DNA fragment was subcloned into pUbiP-GW. The 1.3-kb upstream promoter sequences of *ERF66* and *ERF67* were amplified by PCR from genomic DNA of FR13A and ligated into pCR8 vector followed by subcloning into pGW-Luc.

For protein stability assays, various constructs (Fig. S7B) were amplified using corresponding primers, and double digested with BamHI and HindIII, respectively. Luc were amplified from pGreenII 0800-Luc, and then double digested with HindIII and BamHI. Each gene construct together with Luc fragment, were co-ligated into pUbiP-NosT, which was digested with BamHI.

For recombinant protein expression, the pCR8-SUB1A-1 plasmids were used as template to amplified SUB1A-1 and SUB1A-1N DNA fragments by PCR, both of which were carrying EcoRV-TEV protease cleavage site and XhoI site at 5' and 3' end. After double digestion of EcoRV and XhoI, the SUB1A-1 and SUB1A-1N DNA fragments were ligated into pET32a vectors which were double digested with MscI and XhoI to produce thioredoxin (Trx) -TEV-SUB1A-1/SUB1A-1N-6xHis fusions driven by T7 promoter. All primers used for the cloning of cDNAs are listed in Table S2.

### ***Trans-Activation Assay***

The *trans*-activation assay was conducted as described (66) with minor modifications. TNG67 rice protoplast cells were co-transformed with the effector, reporter, and internal control plasmids at a mass ratio of 1:1:0.5, and incubated for 15 h. Protoplasts were collected by centrifugation for 15 s at 13,000 rpm, resuspended in 0.2 mL extraction buffer (100 mM potassium phosphate buffer, pH 7.8, 1 mM EDTA, 7 mM  $\beta$ -mercaptoethanol, 1% Triton X-100, and 10% glycerol), and vortexed for 15 seconds at high speed. The disrupted protoplasts were centrifuged at 13,000 rpm and 4°C for 5 min. The supernatant was collected and used for luciferase and GUS activity assays. For luciferase activity assay, 50  $\mu$ L of cell extract was placed in a 96-well luminometry plate (Nunc), then 90  $\mu$ L of luciferase assay buffer (25 mM Tricine, pH 7.8, 15 mM potassium phosphate buffer, pH 7.8, 15 mM MgSO<sub>4</sub>, 4 mM EGTA, 2 mM ATP, and 1 mM dithiothreitol) was added. The plate was placed into the VICTOR 3V Multilabel Plate Reader (Perkin Elmer), and 50  $\mu$ L of 0.2 mM luciferin (Promega) was injected into the well to start the reaction. The photons emitted were integrated over a 10-s period and

expressed as a relative light units/10 s. For GUS activity assay, 25  $\mu$ L of cell extract was placed in a 96-well fluorescence plate (Nunc), then 25  $\mu$ L 2 $\times$  GUS assay buffer (100 mM sodium phosphate buffer, pH 7.0, 20 mM  $\beta$ -mercaptoethanol, 20 mM EDTA, 0.2% sodium lauryl sarcosine, 0.25% Triton X-100, and 2.5 mM 4MUG) was added and incubated at 37°C in the dark for 30 min. The reactions were stopped by adding 150  $\mu$ L 0.2 M Na<sub>2</sub>CO<sub>3</sub>. Fluorescence (excitation at 355 nm and emission at 460 nm) was determined by the VICTOR 3V Multilabel Plate Reader.

### **Electrophoretic Mobility Shift Assay**

Electrophoretic mobility shift assay (EMSA) was conducted as described (66) with minor modifications. Fluorescein amidite (FAM) labeled DNA probes were synthesized by PURIGO Biotechnology Co., Ltd.. DNA-protein binding reaction was carried out by incubation of 0.05  $\mu$ M of FAM-labeled probe with 0.5  $\mu$ M of recombinant SUB1A-1 protein in a total volume of 20  $\mu$ L of solution containing 17 mM Hepes, pH 7.9, 60 mM KCl, 7.5 mM MgCl<sub>2</sub>, 0.12 mM EDTA, 17% glycerol, and 1.2 mM dithiothreitol, 0.5  $\mu$ g of poly(dI-dC)(Sigma). The assay mixture was incubated for 20 min at room temperature. Protein-DNA complexes were separated on a 6% native polyacrylamide gel after which the FAM signal was imaged using a Typhoon Scanner (GE Healthcare). All probes used herein are listed in Table S3.

### **Yeast Two-Hybrid Assays**

The yeast two-hybrid experiment was conducted by using the GAL4-based yeast two-hybrid system (Matchmaker Gold Yeast Two-Hybrid System, Clontech). By Gateway system (Invitrogen), the fragment of SUB1A-1 N-terminus was subcloned into the pGADT7-DEST, and the fragments of SUB1A-1, ERF66 and ERF67 C-termini and were subcloned into the pGBKT7-DEST, respectively. pGADT7-AKIN10 (At3g01090.1) and pGBKT7-At5g20700 plasmids were used as positive bait and prey controls. pGADT7-T and pGBKT7-Lam plasmids were used as negative bait and prey controls, respectively. SD-WL (-Trp -Leu) plates were used to select for the presence of both bait and prey vectors, and SD-WLH (-Trp -Leu -His) plates were used to check the interactions between the bait and prey proteins.

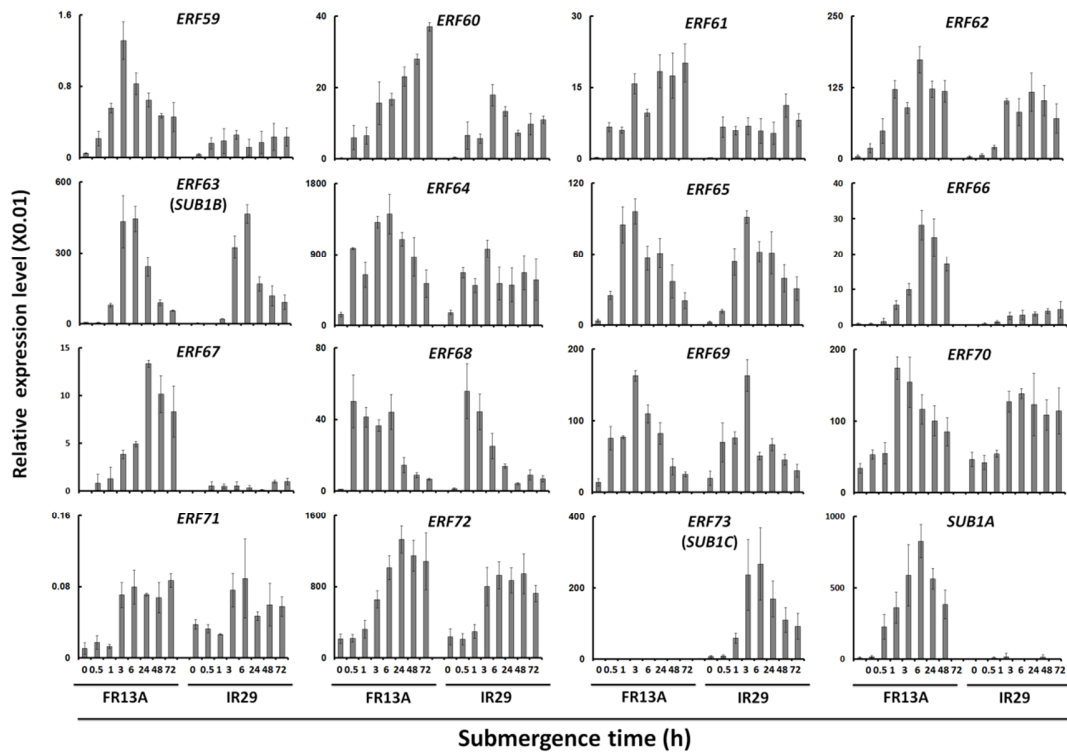

**Fig. S1.** Transcriptional profiles of *OsERFVII*s under submergence in FR13A and IR29.

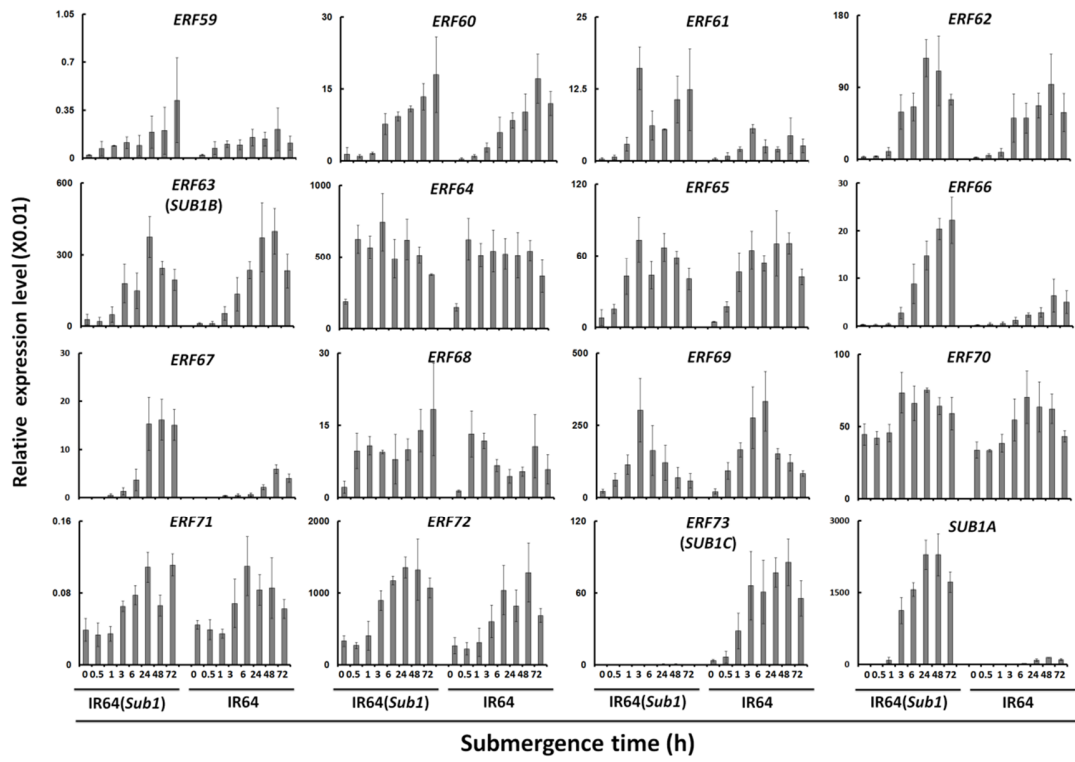

**Fig. S2.** Transcriptional profiles of *OsERFVII*s under submergence in IR64(*Sub1*) and IR64.

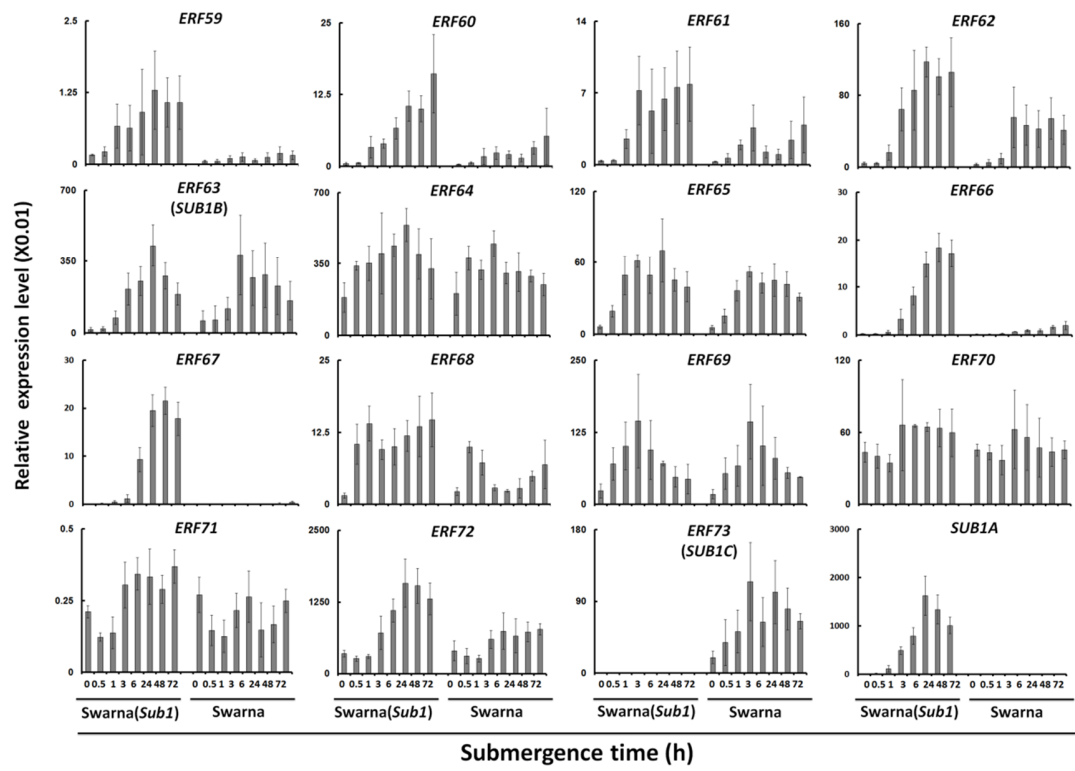

**Fig. S3.** Transcriptional profiles of *OsERFVII*s under submergence in Swarna(*Sub1*) and Swarna.



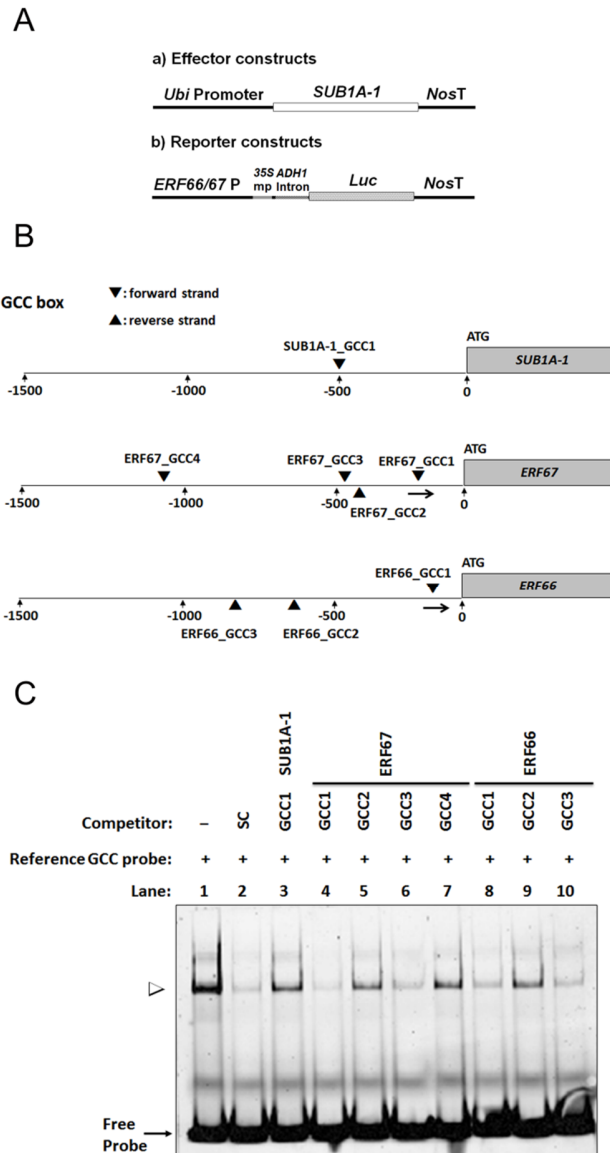

**Fig. S4.** Schematic diagrams of constructs used in transactivation assay and GCC boxes in promoter of *SUB1A-1*, *ERF67* and *ERF66*. (A) Effector and reporter constructs are illustrated. (B) The diagram shows the positions of GCC boxes in the promoters of *SUB1A-1*, *ERF67* and *ERF66*. The flanking sequence of these GCC boxes can be found in Table S3. The arrows indicate the positions of the primer set of CHIP-qPCR. (C) Competition EMSA assays of recombinant SUB1A-1 and FAM-labeled reference GCC DNA (60), using unlabeled DNA for competitive binding. The unlabeled DNA used for competitive binding was in 100-fold excess (W/W) of the FAM-labeled reference GCC DNA. Lane 1, without competitor. Lane 2, unlabeled reference GCC DNA (SC: specific competitor). Lane 3 to 10, unlabeled DNA (upper panel B and Table S3). The triangle indicates the position of the DNA-protein complexes. The arrow indicates the free probes.

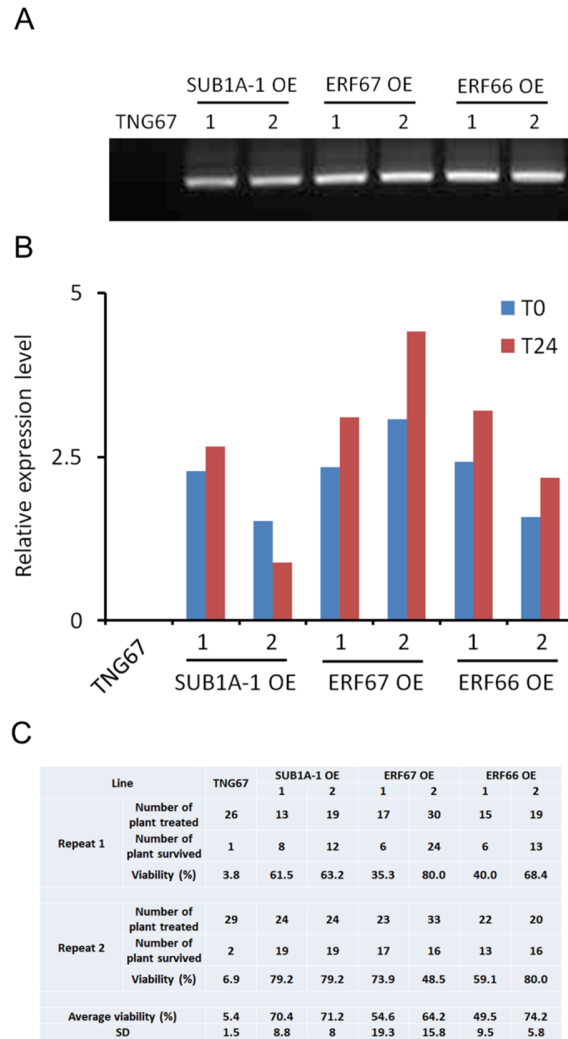

**Fig. S5.** The profiles of SUB1A-1, ERF67, ERF66 overexpression transgenic rice lines. These lines were generated by individually transforming the *UbiP::GST-SUB1A-1/ERF67/ERF66* in pCAMBIA1301 vector into TNG67 rice. (A) Genomic PCR of hygromycin selection marker of 14 days old SUB1A-1 OE/ERF67 OE/ERF66 OE transgenic plants. (B) Transcript levels of transgenic GST tagged SUB1A-1/ERF67/ERF66 were detected by qRT-PCR using GST specific primers (Table S1). Fourteen days old SUB1A-1 OE/ERF67 OE/ERF66 OE transgenic plants and non-transformed TNG67 were submerged for 24 h, and the whole-shoot tissue was harvested before (T0) and after (T24) treatment to perform qRT-PCR. Relative expression level is determined by delta CT of GST normalized by Tubulin mRNA level as the internal control. (C) The viability test of SUB1A-1, ERF67, ERF66 overexpression transgenic rice lines. Two independent replicates were performed. The table shows the number of plants treated, number of plant survived, and viability of each transgenic line in each independent replicate. The average viability and SD of these two replicates shown herein is related to Fig. 3B.

**ERF VII group** \* 20

```

HRE1 At1g72360 : MCGGAVISDYIAPEKIARSS
HRE2 At2g47520 : MCGGAIISDFIWSKSESEPS
RAP2.2 At3g14230 : MCGGAIISDFIPPPRSLRVT
RAP2.3 At3g16770 : MCGGAIISDYAPLVTKAKGR
RAP2.12 At1g53910 : MCGGAIISDFIPPPRSRRVT
ERF71 LOC_Os06g09390 : MCGGAILSDLIPPPRRVTAG
ERF67 LOC_Os07g47790 : MCGGAIISDFIPQREAHRAA
ERF66 LOC_Os03g22170 : MCGGAIPLISSRGPGGKRSL
ERF61 LOC_Os05g29810 : MCGGAIAD FVPPAGARRAA
ERF60 LOC_Os03g08460 : MCGGAILADFTPARVPRRLT
ERF62 LOC_Os03g08470 : MCGGAILAEFIPAPSRAAAA
ERF64 LOC_Os03g08500 : MCGGAILAELIPSAPAARRV
ERF68 LOC_Os01g21120 : MCGGAI IYDYIPARRRLCAS
ERF69 LOC_Os03g08490 : MCGGAILANIIPATPPRPAT
BERF1 AK372481 : MCGGAILAGFIPPSAAAAAA
ERF70 LOC_Os02g54160 : MCGGAI IHHLKGHPGSRRA
SUB1B-1 DQ453964 : MCGGALIPNDYGDKPPPPPS
ERF63 LOC_Os09g11480 : MCGGALIPNDYGDKPPPPPS
ERF72 LOC_Os09g26420 : MCGGAIISGFIPPSAAAAAA
ERF65 LOC_Os07g42510 : MCGGSILGDLHLPVRRTVNA
SUB1A-1 DQ011598 : MCGGEVIPADMPAAPFTPRH
SNORKEL1 AB510478 : MCGGCLIPDELVGKPARRTR
SNORKEL2 AB510479 : MCGENDNNGAAAGSSRRLPA
SUB1C-1 DQ453965 : MRRRVSSSPSSSSSSSPARH
ERF73 LOC_Os09g11460 : MRRRVSSSSSSSSSSSPARH
ERF59 LOC_Os10g25170 : MSQTQSNSNQTHLPTPNPSR

```

**Fig. S6.** N-terminal amino acid sequence alignment of group VII ERFs of Arabidopsis and rice.

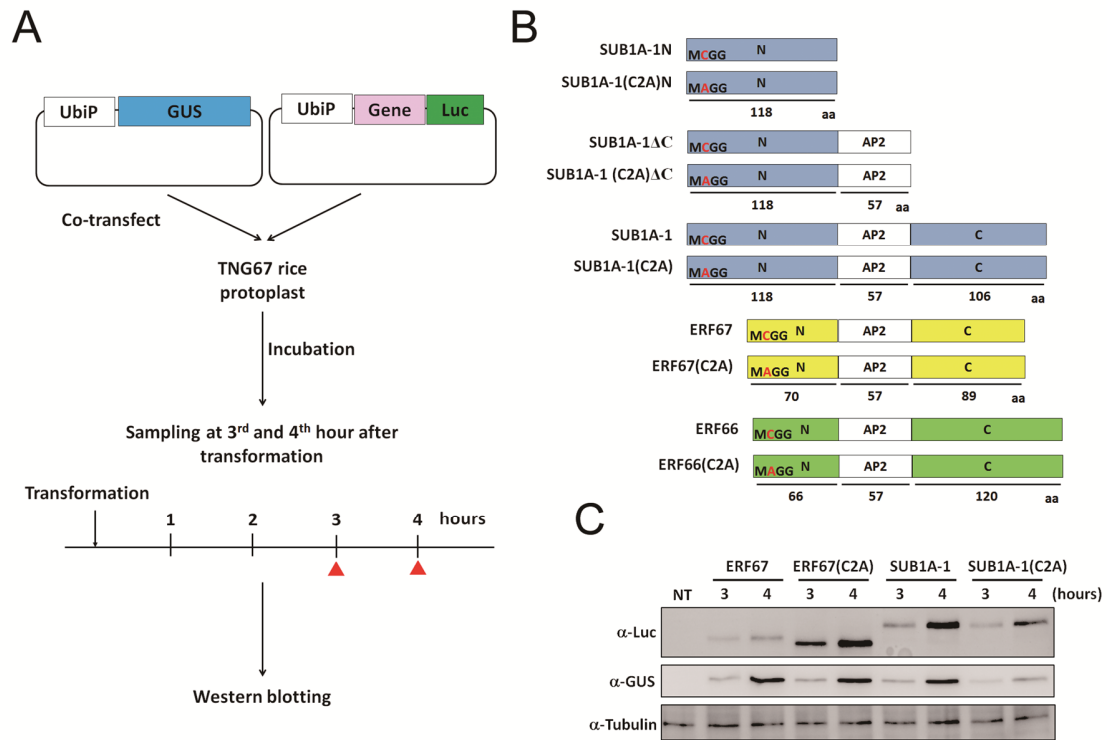

**Fig. S7.** SUB1A-1 is not a substrate for N-end rule pathway in rice cells. (A) Experimental scheme for protein stability assay in rice protoplast cells. UbiP::GUS plasmid was used as the internal control, and was co-transfected with UbiP::tested gene-Luc into TNG67 rice protoplasts. The transfected protoplasts were incubated in W5 solution for 3 or 4 h then harvested for further western blot analysis. (B) The tested proteins included: truncated SUB1A-1N (13 kDa) and SUB1A-1ΔC (20 kDa), wild-type SUB1A-1 (31 kDa), ERF67 (24 kDa) and ERF66 (26 kDa), and C2A variants, i.e. SUB1A-1(C2A)N, SUB1A-1(C2A)ΔC, SUB1A-1(C2A), ERF67(C2A) and ERF66(C2A). (C) The result of SUB1A-1 and ERF67 protein stability assays. *UbiP::SUB1A/ERF67-Luc* constructs were co-transfected into TNG67 rice protoplasts with a *UbiP::GUS* plasmid, which was used as a stable control. The transfected protoplasts were incubated in W5 solution for 3 or 4 h then harvested for further western blot analyses. NT: Non-transfected.

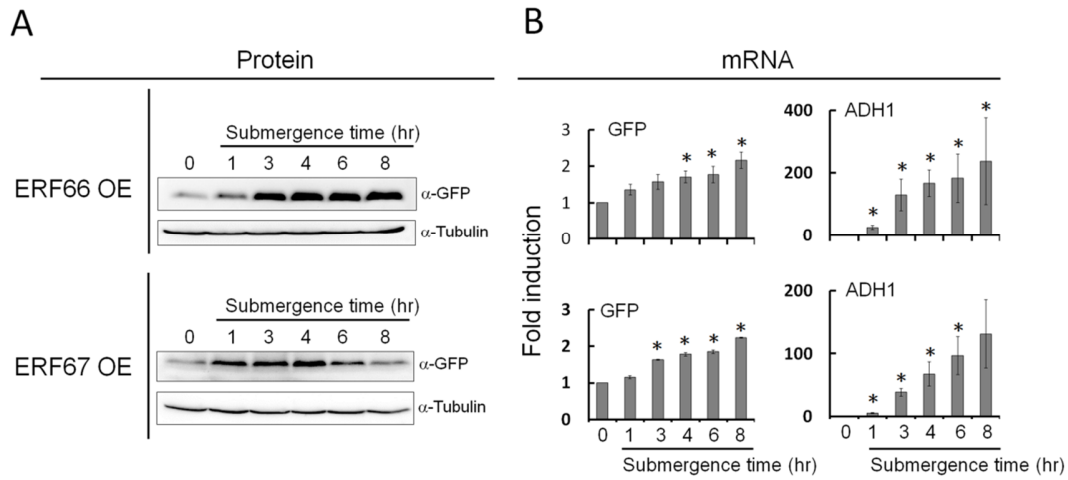

**Fig. S8.** ERF66 and ERF67 proteins are stabilized *in planta* under submergence. (A) Western blot analyses of protein stability of ERF66 and ERF67 under submergence. Fourteen days old transgenic *Arabidopsis* seedling expressing GFP-tagged ERF66/ERF67 were treated submergence at room temperature for the indicated times in dark. The time 0 h indicated the seedling samples were taken right before the submergence treatment. (B) Transcript levels of transgenic GFP (27 kDa) tagged ERF67 (24 kDa)/ERF66 (26 kDa) and endogenous ADH were detected by qRT-PCR using GFP and ADH specific primers (Table S1), respectively. Tubulin mRNA was used as the internal control for normalization. The gene expression levels of the samples at 0 h were set to 1 fold. The data represent means $\pm$ SD from two to three independent replicates. Significant differences compared with the sample at 0 h by Student's *t* test: \*,  $P < 0.05$

```

OsERF66 : MCGGAIIP-----LISSRGPGG-----KRSLSAADELWPPPPCHASDDP----- : 38
OsERF67 : MCGGAIISDFIQREAHRAATG-----SKRALCASDFWFSISQEAAD----- : 42
SUB1A1  : MCGGEVVPADMPAAPFTPRHGDGETWVDRKRRNKKKKRKGADFWEAIFQEFMAADDDDDGGGLVLSKSLVLR : 75

OsERF66 : -----AEQAADEEIQEQAARRRQRRGERR-TLYRGIRRRPWGKWAAEIRDPAK GARVWLGTFFAT : 98
OsERF67 : -----FDHLTPCTFTPDQAEDFTKKRERK-TLYRGIRRRPWGKWAAEIRDPAK GARVWLGTFFAT : 102
SUB1A1  : PGENDAGRGAATMSMFLDPVTEEAEPVAEKEFRRRRFRRSYEHGIRQRPWGRWSSEIRDPAKGVRLWLGTFFAT : 150

OsERF66 : AEAARAYDRARRIRGKAKVNFNEDNAFAAAAPPYHLAAYCGDASSTSYLYPMAMTFAAGLREQQLMTT : 173
OsERF67 : AEAARAYDRARRIRGAKAKVNFNED-----PFLDDPAADGCHSHGC-----AAIPCR----- : 151
SUB1A1  : AVEAALAYDAEARRIRGKWKARTNFPADLS---SPPPSQELCLLLNDNCLITIGEPIDDAASTS----- : 213

OsERF66 : VEYSVNDAYDVAISVYFCPPPAVAYEFSAVGGGAVVVPVSAVAPAMTYGQSOEVAAPLMWNFDIT-AMPM : 243
OsERF67 : -EFMDYDAMMAG--EFHQEYVVAAGVPAAP--AEEAFTVAVVHHHLPQPCCDAGLELWSEFNIHTAVPM : 216
SUB1A1  : --TSTTEASGDARLQLECCSDDVMSLILAGYDVASGDDTWTSGASSTSVNCEIKTPSIHQNISYAGEA- : 281

```

**Fig. S9.** The protein sequence alignment of SUB1A-1, ERF66 and ERF67. The underline indicates the AP2 domain.

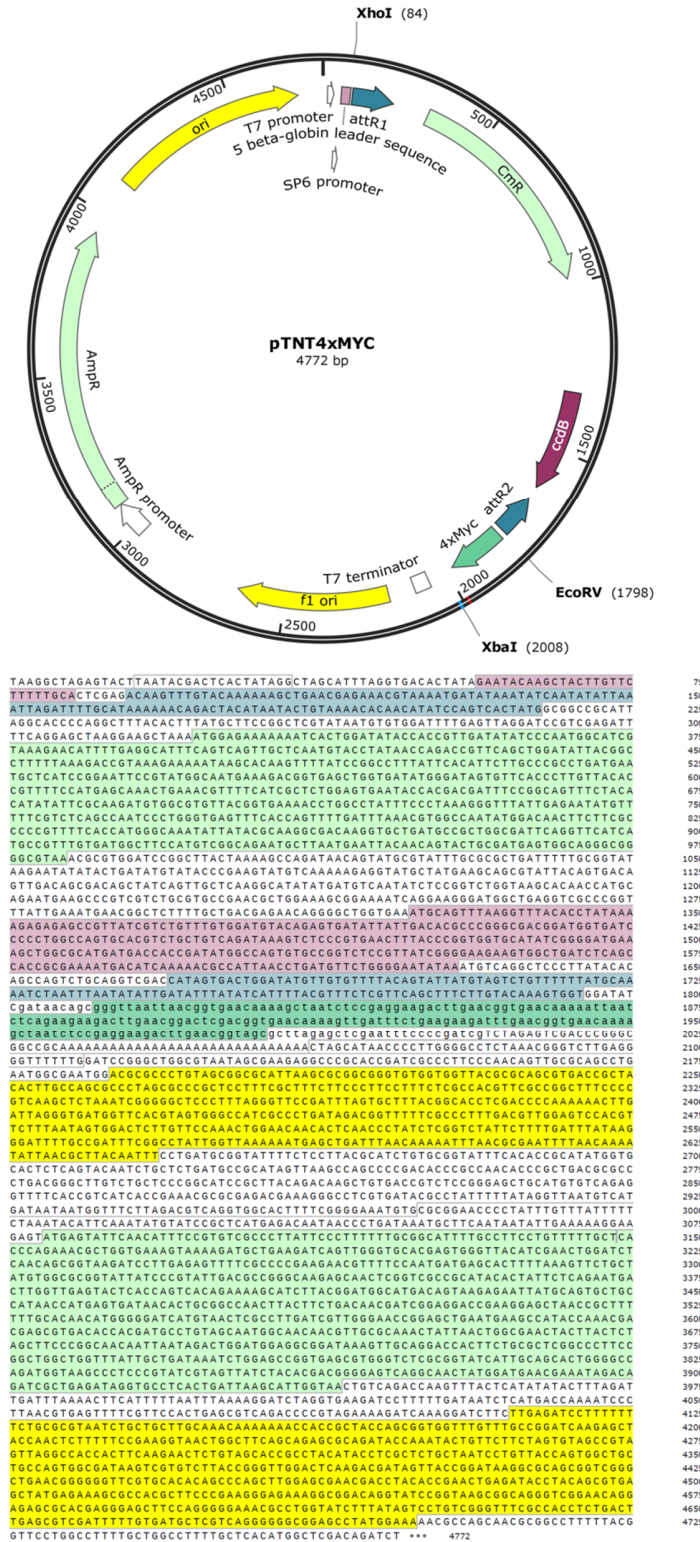

Fig. S10. The map and sequence of pTNT4xMYC.

**Table S1.** Primers for qRT-PCR or genomic PCR.

| Gene name                  | Accession      | Forward primer                 | Reverse Primer                   |
|----------------------------|----------------|--------------------------------|----------------------------------|
| ERF59                      | LOC_Os10g25170 | CATGGCATGGCACCTGATGATG         | AAACGCATCAAGAACGAGTGAC<br>C      |
| ERF60                      | LOC_Os03g08460 | AGACGTCCGTTTGCCTTGCTTG         | CTTTCAGGCTTGCAGCACAAC            |
| ERF61                      | LOC_Os05g29810 | GGGTGTTCTTCTGGGAATCCTTG<br>G   | CCTGGCAATGCAATGCTTAACG           |
| ERF62                      | LOC_Os03g08470 | TCGAGCAGTTCGACGATGACTC         | GACACGAGATTTGGACGCGAAC           |
| ERF63                      | LOC_Os09g11480 | AGCTCATACTGCTGGAGTGCTG         | GCGCGCTGCTAATTAACCATTC           |
| ERF64                      | LOC_Os03g08500 | ACCCTGTGACTCGATCTTGTACC        | GACGAACACATGCTTGCTTGGC           |
| ERF65                      | LOC_Os07g42510 | GGGATTTTCGATGTTGATTGCGATG      | AGACCGTTCATGTCGGATTCTTG<br>G     |
| ERF66                      | LOC_Os03g22170 | GCTCCGCTCATGTGGAATTCG          | TCCACGGTAAGACAATCACATTG<br>G     |
| ERF67                      | LOC_Os07g47790 | TTCCACCGACTCGTCAGCTTAG         | TGCGGGATGAAGTCGGAAATG            |
| ERF68                      | LOC_Os01g21120 | TGTTTCCGCTCCACTTCCCTTC         | CGGGATGTAGTCGTAGATGATTGC         |
| ERF69                      | LOC_Os03g08490 | GCGTCATTCGACAGTGACAACAA<br>C   | TCGCCGAACAAGAAAGGATCGTC          |
| ERF70                      | LOC_Os02g54160 | TCCTGCAATGAACTCTGCTGCTC        | GCAGCCAAATGAGTTGCTTCCC           |
| ERF71                      | LOC_Os06g09390 | CGGCTTCGCTAAAGGTGGATTG         | CTCTGATTCCGCAGCCCATTG            |
| ERF72                      | LOC_Os09g26420 | CGAAATGTTCTGGTCAGTGTGGT<br>C   | CTTGGCCATACACATTCAACATGG         |
| ERF73                      | LOC_Os09g11460 | CGAACAACAGAGCAGATTCAGG         | TTAGGCGAGTCGCATGTCAAGG           |
| Sub1A                      | DQ011598       | ACAACGGCCTCATCACAATC           | AGGCTCCAGATGTCCATGTC             |
| Tubulin                    | LOC_Os07g38730 | CGCAGTTGCAACCATCAAGACG         | ACTTGAATCCAGTAGGGCACCAG          |
| GFP tag                    |                | CGACCACTACCAGCAGAACACCC        | CAGCTCGTCCATGCCGAGAGT            |
| ADH1                       | At1g77120      | CATGAACAAGGAGCTGGAGCTTG        | CTCTCCCTTCAGCATGTAATCAAA<br>GG   |
| TUB3                       | At5g62700      | GGTTGGTTTTGCTCCTCTCACC         | TAGCGTCCGTGCCTTGGGTC             |
| GST tag                    |                | TTTGTATGAGCGCGATGAAG           | ACGCTCTTTTGGACAACCAC             |
| For ChIP-qPCR              |                |                                |                                  |
| ERF66 promoter             |                | CCTCGCTCTCCTCGTCACCG           | GTGGGTGCGGTCCGCGTAGG             |
| ERF67 promoter             |                | CCCCTCTCCTTTTACACACG           | GAGCCGTGGGCCGCGGCTGG             |
| For hygromycin genomic PCR |                |                                |                                  |
| Hyg                        |                | TGCATCGGCCGCGCTCCCGATTC<br>CGG | CCACGGCCTCCAGAAGAAGATGT<br>TGGCG |



**Table 2.** Primers for cDNAs cloning.

| Gene fragment                                                  | Forward primer                                                                                                | Reverse primer                                                        |
|----------------------------------------------------------------|---------------------------------------------------------------------------------------------------------------|-----------------------------------------------------------------------|
| For trans-activation assay and <i>in vitro</i> stability assay |                                                                                                               |                                                                       |
| SUB1A-1/2                                                      | ATGTGTGGAGGAGAAGTGATCCCCGC                                                                                    | TCAGGCTTCCCCTGCATATGATATGTTTTG                                        |
| SUB1A-1/2 (C2A)                                                | ATGGCGGGAGGAGAAGTGATCCCCGC                                                                                    | TCAGGCTTCCCCTGCATATGATATGTTTTG                                        |
| ERF66 promoter                                                 | TGACACGCTTGGGGGCATGCGGTAGC                                                                                    | ATCTATCTTCACTAGCTAGCTCGATCG                                           |
| ERF67 promoter                                                 | GAAATCTATCAAAACATTGTGCTATTCTTC                                                                                | CTTTGCTGCTGCTGCGCGCTTGCGG                                             |
| For protein stability assay                                    |                                                                                                               |                                                                       |
| SUB1A-1                                                        | CGCGGATCCATGTGTGGAGGAGAAGTGATCCCCGC                                                                           | CCCAAGCTTGGCTTCCCCTGCATATGATATGTTTTG                                  |
| SUB1A-1(C2A)                                                   | CGCGGATCCATGGCGGGAGGAGAAGTGATCCCCGC                                                                           | CCCAAGCTTGGCTTCCCCTGCATATGATATGTTTTG                                  |
| SUB1A-1 N                                                      | CGCGGATCCATGTGTGGAGGAGAAGTGATCCCCGC                                                                           | CCCAAGCTTCCGCCTCGGCCGGCGCCGGCGAGGCTTC                                 |
| SUB1A-1(C2A)N                                                  | CGCGGATCCATGGCGGGAGGAGAAGTGATCCCCGC                                                                           | CCCAAGCTTCCGCCTCGGCCGGCGCCGGCGAGGCTTC                                 |
| SUB1A-1 ΔC                                                     | CGCGGATCCATGTGTGGAGGAGAAGTGATCCCCGC                                                                           | CCCAAGCTTTGGGAAGTTTGTCCGGGCTTTCCAGCC                                  |
| SUB1A-1(C2A)ΔC                                                 | CGCGGATCCATGGCGGGAGGAGAAGTGATCCCCGC                                                                           | CCCAAGCTTTGGGAAGTTTGTCCGGGCTTTCCAGCC                                  |
| ERF66                                                          | CGCGGATCCATGTGCGGGCGGCCATCCCGCTG                                                                              | CCCAAGCTTCATTGGCATGGCCGTGATGTC                                        |
| ERF66(C2A)                                                     | CGCGGATCCATGGCGGGCGGCCATCCCGCTG                                                                               | CCCAAGCTTCATTGGCATGGCCGTGATGTC                                        |
| ERF67                                                          | CGCGGATCCATGTGTGGCGGCGCGATCATTTCCGAC                                                                          | CCCAAGCTTCATCGGCACGGCCGTGTGG                                          |
| ERF67(C2A)                                                     | CGCGGATCCATGGCGGGCGGCGCGATCATTTCCGAC                                                                          | CCCAAGCTTCATCGGCACGGCCGTGTGG                                          |
| Luc                                                            | CCCAAGCTTGAAGACGCCAAAAACATAAAG                                                                                | CGCGGATCCTTACAATTTGGACTTTCCGCCCTTC                                    |
| For recombinant protein expression                             |                                                                                                               |                                                                       |
| SUB1A-1                                                        | CCGCCGGATATCAGAGAACCTCTACTTCCAATCGATGTGTGGAGGAGAAGTGATCCCCG<br>(the TEV protease cleavage site is underlined) | CCGCCGCTCGAGGGCTTCCCCTGCATATGATATGTTTTG                               |
| SUB1A-1N                                                       | CCGCCGGATATCAGAGAACCTCTACTTCCAATCGATGTGTGGAGGAGAAGTGATCCCCG<br>(the TEV protease cleavage site is underlined) | CCGCCGCTCGAGCCGCCTCGGCCGGCGCCGGCGAGGCTTC                              |
| For pTNT4xMYC construction                                     |                                                                                                               |                                                                       |
| ccdB fragment                                                  | CCGCTCGAGACAAGTTTGTACAAAAAAGCTGAA<br>(the XhoI site is underlined)                                            | CCGGATATCCACCACTTGTACAAGAAAGCTGAA<br>(the EcoRV site is underlined)   |
| 4xMYC fragment                                                 | CCGGATATCGATAACAGCGGGTAAATTAACGG<br>(the EcoRV site is underlined)                                            | CTAGTCTAGACGATCGGGGAAATTCGAGCTCTAAGC<br>(the XbaI site is underlined) |

**Table S3.** Probes for EMSA.

| Probe                      | sequence                 |
|----------------------------|--------------------------|
| ATCTA reference probe (59) | CAATCTAAATATCTAAAATATAAA |
| GCC reference probe (60)   | CGCGATCGCCGCCGCCGGATCGCG |
| SUB1A-1 GCC1               | TGGAGAGGGCCGCCCCATCGTG   |
| ERF66 GCC1                 | GATCGATCGCCGCCGGTTTAGA   |
| ERF66 GCC2                 | TAGATCTAGGCGGCACCATGG    |
| ERF66 GCC3                 | GGTGTTCGTGGCGGCGGGGTCGA  |
| ERF67 GCC1                 | CCCCCGCGCCGCCACGCTCT     |
| ERF67 GCC2                 | AAAGCAGCGGCGGCACCGAGCG   |
| ERF67 GCC3                 | GAGCAGCAGCCGCCGTCACCAT   |
| ERF67 GCC4                 | AGCCGGCAGCCGCCCGTGTCCA   |

## SI References

61. Hsu FC, Chou MY, Peng HP, Chou SJ, Shih MC (2011) Insights into hypoxic systemic responses based on analyses of transcriptional regulation in *Arabidopsis*. *PLoS One* 6:e28888.
62. Bolger AM, Lohse M, Usadel B. (2014). Trimmomatic: a flexible trimmer for Illumina sequence data. *Bioinformatics* 30:2114-2120.
63. Langmead B, Salzberg S. (2012) Fast gapped-read alignment with Bowtie 2. *Nature Methods* 9:357-359.
64. Love MI, Huber W, Anders S (2014) Moderated estimation of fold change and dispersion for RNA-seq data with DESeq2. *Genome Biology*, 15:550.
65. Zhou Du, Xin Zhou, Yi Ling, Zhenhai Zhang, Zhen Su (2010) agriGO: a GO analysis toolkit for the agricultural community. *Nucl Acids Res* 38:W64-W70.
66. Lu CA, Lim EK, Yu SM (1998) Sugar response sequence in the promoter of a rice  $\alpha$ -Amylase gene serves as a transcriptional enhancer. *J Biol Chem* 273:10120-10131.
